# Supplementary material
Source: MDPI journal article supplement (https://www.mdpi.com/2410-3888/6/3/33)
Supplement: s1 [file s1]

**Table S1.** Exploitation rate (*E*) of and catch trend of the selected bycatch of Hilsa gillnet fishery of Bangladesh. Species listed in bold text are from inland habitat (river) and the rest of the species are reported from marine habitat.

| Species name                     | <i>E</i> | Ref. | Fisher's perception (n=50) of catch trend |        |            | Split analysis | Catch trend |
|----------------------------------|----------|------|-------------------------------------------|--------|------------|----------------|-------------|
|                                  |          |      | Increasing                                | Stable | Decreasing |                |             |
| <b><i>Clupisoma garua</i></b>    | 0.34     | 1    | 9                                         | 5      | 36         | -1             | D           |
| <i>Coilia ramcarati</i>          | 0.87     | 2    | 18                                        | 20     | 12         | 1              | S           |
| <i>Harpadon nehereus</i>         | 0.58     | 3    | 21                                        | 18     | 11         | 1              | S           |
| <i>Ilisha filigera</i>           | 0.40     | 4    | 19                                        | 18     | 13         | 1              | S           |
| <i>Lates calcarifer</i>          | 0.37     | 5    | 10                                        | 4      | 36         | -1             | D           |
| <i>Lepturacanthus savala</i>     | 0.43     | 9    | 17                                        | 18     | 15         | 1              | S           |
| <i>Megalaspis cordyla</i>        | 0.33     | 10   | 27                                        | 17     | 6          | 1              | S           |
| <b><i>Mystus gulio</i></b>       | 0.47     | 5    | 9                                         | 15     | 26         | 1              | S           |
| <i>Nemipterus japonicus</i>      | 0.41     | 6    | 8                                         | 39     | 3          | 1              | S           |
| <i>Netuma thalassina</i>         | 0.62     | 7    | 3                                         | 6      | 41         | -1             | D           |
| <b><i>Otolithoides pama</i></b>  | 0.27     | 5    | 25                                        | 17     | 8          | 0              | NS          |
| <i>Pampus argenteus</i>          | 0.23     | 8    | 21                                        | 18     | 11         | 1              | S           |
| <i>Pampus chinensis</i>          | 0.36     | 8    | 26                                        | 16     | 8          | 1              | S           |
| <i>Parastromateus niger</i>      | 0.56     | 8    | 11                                        | 7      | 32         | -1             | D           |
| <i>Pennahia argentata</i>        | 0.29     | 11   | 6                                         | 34     | 10         | 1              | S           |
| <i>Polynemus paradiseus</i>      | 0.72     | 12   | 4                                         | 5      | 41         | -1             | D           |
| <i>Pomadasys argenteus</i>       | 0.51     | 13   | 13                                        | 6      | 31         | -1             | D           |
| <i>Rastrelliger kanagurta</i>    | 0.65     | 14   | 18                                        | 25     | 7          | 1              | S           |
| <b><i>Rhinomugil corsula</i></b> | 0.42     | 15   | 21                                        | 22     | 7          | 1              | S           |
| <i>Scoliodon laticaudus</i>      | 0.57     | 16   | 7                                         | 3      | 40         | -1             | D           |
| <i>Scomberomorus guttatus</i>    | 0.45     | 17   | 12                                        | 27     | 11         | 1              | S           |

D = Decreasing, NS = Not significant, S = Stable.

## References

1. Ahmed, M.S.; Khanom, R.; Mostafa, M.G. Population dynamics of *Clupisoma garua* (Siluriformes: Schilbeidae) from the river Jamuna. Bangladesh J. Fish. Res. 2003, 31, 7–14.
2. Parvez, M.S.; Nabi, M.R., 2015. Population dynamics of *Coilia ramcarati* from the estuarine set bagnet fishery of Bangladesh. Walailak J. Sci. Technol. 12, 539–552.
3. Sarker, M.N., Humayun, M., Rahman, M.A., Uddin, M.S., 2017. Population dynamics of Bombay Duck *Harpadon nehereus* (Hamilton, 1822) of the Bay of Bengal along Bangladesh coast. Bangladesh J. Zool. 45, 101–110.
4. Rashid, H., Mustafa, M.G., Sukhan, Z.P., Dewan, S., Matsuyama, M., 2007. Growth, mortality, recruitment patterns and the length–weight relationships of big eye shad (*Ilisha filigera*) captured by set bag nets in the upper bay of bengal off the Bangladesh coast. Bull. Inst. Trop. Agr., Kyushu Univ. 30, 39–46.
5. Mustafa, M.G., Ahmed, I., Ilyas, M., 2019. Population dynamics of five important commercial fish species in the Sundarbans ecosystem of Bangladesh. J. Appl. Life Sci. Int. 22, 1–13.
6. Mustafa, M.G., 1994. Length–based estimates of vital statistics in threadfin bream (*Nemipterus japonicus*) from Bay of Bengal, Bangladesh. Naga, ICLARM Q. 17, 34–37.
7. Sultana, R., Alam, M.S., Nazrul, K.M.S., Mamun, A., Al-Mamun, M.A., 2019. Length–weight relationship and population dynamics study of the giant catfish (*Arius thalassinus*) in the Bay of Bengal coast of Bangladesh. Res. Agric. Livest. Fish. 6, 439–444.

8. Karim, E., Liu, Q., Rahman, M.F., Khatun, M.H., Barman, P.P., Shamsuzzaman, M.M., Mahmud, Y., 2018. Comparative assessment of population biology of three popular pomfret species, *Pampus argenteus*, *Pampus chinensis* and *Parastromateus niger* in the Bay of Bengal, Bangladesh. Iran. J. Fish. Sci. 1–22. <https://doi.org/10.22092/ijfs.2018.119873>
9. Mustafa, G., Zafar, M., Haque, M.A., Amin, S.M.N., 2000. Population dynamics of the Ribbon fish, *Lepturacanthus savala* (Cuvier 1829) from the north-eastern part of the Bay of Bengal. Bangladesh J. Fish. Res. 4, 179–184.
10. Zafar, M., Mustafa, G., Amin, S.M.N., Haque, M.A., 2000a. Population dynamics of *Megalaspis cordyla* (Linnaeus, 1758) from northeastern part of the Bay of Bengal, Bangladesh. Asian Fish. Sci. 47, 163–168.
11. Zafar, M., Mustafa, G., Amin, S.M.N., Haque, M.A., 2000b. Population dynamics of *Johnius argentatus* (Houttuyn ) from the Northeastern Part of the Bay of Bengal , Bangladesh. 13, 243–249.
12. Rashed-Un-Nabi, M., Hoque, M.A., Rahman, R.A., Mustafa, S., Kader, M.A., 2007. Population dynamics of *Polynemus paradiseus* from estuarine Set Bag Net fishery of Bangladesh. Chiang Mai J. Sci. 34, 355–365.
13. Mustafa, G.M., Azadi, M.A., 1995. Population dynamics of White Grunter *Pomadasys hasta* from the Bay of Bengal. Chittagong Univ. Stud. Part II Sci. 19, 19–22.
14. Mustafa, M.G., Shahadat, A.H., 2003. Population dynamics and the management of the Indian mackerel *Rastrelliger kanagurta* from the Bay of Bengal. Bangladesh J. Fish. Res. 7, 159–168.
15. Ara, S.I., Azadi, M.A., Nasiruddin, M., Hossain, A., Mustafa, M.G., 2019. Population dynamics of the Mullet fish, *Rhinomugil corsula* (Hamilton, 1822), in the Sitakunda coast of the Bay of Bengal. Bangladesh J. Zool. 47, 305–314.
16. Karim, E., Qun, L., Mahmood, M.A., Baset, A., Hoq, M.E., Shamsuzzaman, M.M., Das, A., 2017. Assessment of some demographic trends of Spadenose shark (*Scoliodon laticaudus*) of the Bay of Bengal, Bangladesh. Indian J. Geo-Marine Sci. 46, 1986–1995.
17. Rashid, H., Mustafa, M.G., Dewan, S., 2010. Population dynamics and the management of the Indo-Pacific king mackerel *Scomberomorus guttatus* from the upper Bay of Bengal off Bangladesh coast. Bangladesh Vet. 27, 82–90.

**Table S2.** Study districts including the survey points details. Values inside the parenthesis indicates the number of participants in each FGD.

| District    | Survey Points ID | Survey Station Name                                | Type of Survey Station | Adjacent River/Marine area   | Hilsa Fisher Interviewed | FGD (No)    | KII |
|-------------|------------------|----------------------------------------------------|------------------------|------------------------------|--------------------------|-------------|-----|
| Chandpur    | CHA1             | Rajrajeshwar                                       | Inland                 | Meghna and Padma river       | 15                       | 1(5)        | 1   |
|             | CHA2             | Haim Char                                          | Inland                 | Meghna river                 | 15                       | 1(5)        |     |
| Barishal    | BAR1             | Puraton Hizla Bazar                                | Inland                 | Meghna river                 | 15                       | 1(5)        | 2   |
|             | BAR2             | Mehendiganj                                        | Inland                 | Meghna river                 | 15                       | 1(5)        |     |
| Bhola       | BHO1             | Daulatkhan                                         | Inland                 | Meghna river                 | 15                       | 1 (5)       | 2   |
|             | BHO2             | Mirza Kalur Ghat                                   | Inland                 | Meghna river                 | 15                       | 1(5)        |     |
|             | BHO3             | Joya Mazir Ghat                                    | Inland                 | Tetulia river                | 15                       | 1(5)        | 1   |
|             | BHO4             | Bokshi Fish Market, Charfassion                    | Marine, Inland         | Bay of Bengal, Tetulia river | 30, 15                   | 1(10), 1(5) | 1   |
| Patuakhali  | PAT1             | Sudhirpur                                          | Inland                 | Andharmanik river            | 15                       | 1(5)        | 1   |
|             | PAT2             | Char Baliatali                                     | Inland                 | Galachipa river              | 15                       | 1(5)        | 1   |
|             | PAT3             | Mohipur Fish Landing Centre                        | Marine                 | Bay of Bengal                | 30                       | 1(10)       | 1   |
| Barguna     | BAU              | Patharghata BFDC Fish Landing Centre               | Marine                 | Bay of Bengal                | 30                       | 1(10)       | 2   |
| Chattogram  | CHI              | Fishery Ghat (New) Bangladesh Fisheries            | Marine                 | Bay of Bengal                | 30                       | 1(10)       | 1   |
| Cox's Bazar | COX              | Development Corporation (BFDC) Fish Landing Centre | Marine                 | Bay of Bengal                | 30                       | 1(10)       | 2   |

FGD=Focus Group Discussion; KII= Key Informant Interview.

**Table S3.** Productivity attributes with values (e.g.,  $t_{max}$  value), scores (e.g.,  $t_{max}$  score) and corresponding references used in the productivity susceptibility analysis (PSA) for the selected bycatch of Hilsa gillnet fishery of Bangladesh. Each of the attribute's names in full form is provided in the main text (Table 2). Attributes values have mainly complied from existing literature (normal text). In absence of information for particular attributes (bold italic text), we have assigned scores in both the conservative and alternative scoring methods. Score inside the parentheses is being assigned considering conservative scoring approach, whereas value outside the parentheses is assigned based on corresponding attribute value calculated from empirical relationship equations (described in the main text).

| Species name                  | $t_{max}$ value | $t_{max}$ score | Ref. | $L_{max}$ value | $L_{max}$ score | Ref. | $k$ value | $k$ score | Ref. | $M$ value | $M$ score | Ref. |
|-------------------------------|-----------------|-----------------|------|-----------------|-----------------|------|-----------|-----------|------|-----------|-----------|------|
| <i>Clupisoma garua</i>        | 3.8             | <b>3(1)</b>     | 1    | 60              | 2               | 12   | 0.79      | 2         | 27   | 1.53      | 3         | 27   |
| <i>Coilia ramcarati</i>       | 6.12            | <b>2(1)</b>     | 1    | 25              | 3               | 13   | 0.49      | 2         | 28   | 1.19      | 2         | 28   |
| <i>Harpadon nehereus</i>      | 2.31            | <b>3(1)</b>     | 1    | 40              | 2               | 14   | 1.3       | 3         | 29   | 1.86      | 3         | 29   |
| <i>Ilisha filigera</i>        | 4               | 2               | 2    | 47              | 2               | 15   | 0.8       | 3         | 15   | 1.35      | 3         | 15   |
| <i>Lates calcarifer</i>       | 6               | 2               | 3    | 152             | 1               | 16   | 0.5       | 2         | 3    | 0.956     | 2         | 3    |
| <i>Lepturacanthus savala</i>  | 3.3             | 3               | 4    | 104             | 1               | 17   | 0.8       | 3         | 17   | 1.08      | 2         | 17   |
| <i>Megalaspis cordyla</i>     | 4               | 2               | 5    | 40              | 2               | 18   | 0.58      | 2         | 30   | 1.17      | 2         | 30   |
| <i>Mystus gulio</i>           | 4               | 2               | 3    | 29.2            | 3               | 19   | 0.75      | 2         | 3    | 1.59      | 3         | 3    |
| <i>Nemipterus japonicus</i>   | 8               | 2               | 6    | 32              | 3               | 20   | 0.94      | 3         | 31   | 1.81      | 3         | 31   |
| <i>Netuma thalassinus</i>     | 9.09            | <b>1(1)</b>     | 1    | 95              | 1               | 21   | 0.33      | 2         | 21   | 0.62      | 1         | 21   |
| <i>Otolithoides pama</i>      | 3.5             | 3               | 3    | 31              | 3               | 3    | 0.8       | 3         | 3    | 1.507     | 3         | 3    |
| <i>Pampus argenteus</i>       | 7               | 2               | 7    | 52              | 2               | 22   | 0.39      | 2         | 22   | 0.73      | 1         | 22   |
| <i>Pampus chinensis</i>       | 4.84            | <b>2(1)</b>     | 1    | 50              | 2               | 22   | 0.62      | 2         | 22   | 0.99      | 2         | 22   |
| <i>Parastromateus niger</i>   | 6               | 2               | 8    | 54              | 2               | 22   | 0.94      | 3         | 22   | 1.28      | 3         | 22   |
| <i>Pennahia argentata</i>     | 3.49            | <b>3(1)</b>     | 1    | 44.2            | 2               | 23   | 0.86      | 3         | 23   | 1.44      | 3         | 23   |
| <i>Polynemus paradiseus</i>   | 6.12            | <b>2(1)</b>     | 1    | 21.7            | 3               | 24   | 0.49      | 2         | 32   | 1.21      | 2         | 32   |
| <i>Pomadasys argenteus</i>    | 7.89            | <b>2(1)</b>     | 1    | 55              | 2               | 20   | 0.38      | 2         | 33   | 0.79      | 2         | 33   |
| <i>Rastrelliger kanagurta</i> | 4               | 2               | 9    | 26              | 3               | 25   | 0.9       | 3         | 25   | 1.71      | 3         | 25   |
| <i>Rhinomugil corsula</i>     | 7               | 2               | 10   | 35              | 3               | 14   | 1         | 3         | 34   | 1.73      | 3         | 34   |
| <i>Scoliodon laticaudus</i>   | 6               | 2               | 11   | 75              | 2               | 26   | 0.3       | 1         | 35   | 0.57      | 1         | 35   |
| <i>Scomberomorus guttatus</i> | 5               | <b>2(1)</b>     | 1    | 82              | 2               | 18   | 0.6       | 2         | 36   | 0.99      | 2         | 36   |

**Table S3.** (cont...) Productivity attributes with values (e.g.,  $t_{max}$  value), scores (e.g.,  $t_{ma}$  score) and corresponding references used in the productivity susceptibility analysis (PSA) for the selected bycatch of Hilsa gillnet fishery of Bangladesh. Each of the attribute's names in full form is provided in the main text (Table 2). Attributes values have mainly complied from existing literature (normal text). In absence of information for particular attributes (bold italic text), we have assigned scores in both the conservative and alternative scoring methods. Score inside the parentheses is being assigned considering conservative scoring approach, whereas value outside the parentheses is assigned based on corresponding attribute value calculated from empirical relationship equations (described in the main text).

| Species name                  | MF value | MF score | Ref. | BS score | Ref.   | $t_{mat}$ value | $t_{mat}$ score | Ref. | MTL value | MTL score | Ref. |
|-------------------------------|----------|----------|------|----------|--------|-----------------|-----------------|------|-----------|-----------|------|
| <i>Clupisoma garua</i>        | 6159     | 1        | 37   | 3        | 57     | 1               | 2               | 63   | 3.7       | 2         | 59   |
| <i>Coilia ramcarati</i>       | 3129     | 1        | 38   | 3        | 38     | 1.86            | <b>2(1)</b>     | 1    | 3.4       | 3         | 59   |
| <i>Harpadon nehereus</i>      | 89600    | 3        | 39   | 3        | 58     | 0.68            | <b>3(1)</b>     | 1    | 4.2       | 1         | 59   |
| <i>Ilisha filigera</i>        | 32756    | 2        | 40   | 3        | 42     | 1               | 2               | 42   | 3.5       | 2         | 59   |
| <i>Lates calcarifer</i>       | 4448496  | 3        | 41   | 3        | 20, 59 | 2               | 2               | 20   | 3.8       | 2         | 59   |
| <i>Lepturacanthus savala</i>  | 9178     | 1        | 42   | 3        | 60     | 0.55            | <b>3(1)</b>     | 1    | 4.3       | 1         | 59   |
| <i>Megalaspis cordyla</i>     | 91854    | 3        | 43   | 3        | 61     | 1.3             | <b>2(1)</b>     | 1    | 3.9       | 2         | 59   |
| <i>Mystus gulio</i>           | 11436    | 2        | 44   | 3        | 57     | 1.19            | <b>2(1)</b>     | 1    | 4         | 1         | 59   |
| <i>Nemipterus japonicus</i>   | 14212    | 2        | 45   | 3        | 20     | 0.84            | <b>3(1)</b>     | 1    | 4.1       | 1         | 59   |
| <i>Netuma thalassinus</i>     | 66       | 1        | 46   | 1        | 62     | 2.3             | <b>1(1)</b>     | 1    | 3.5       | 1         | 59   |
| <i>Otolithoides pama</i>      | 2387     | 1        | 47   | 3        | 63     | 1.1             | <b>2(1)</b>     | 1    | 3.9       | 2         | 59   |
| <i>Pampus argenteus</i>       | 26109    | 2        | 47   | 3        | 57     | 1.82            | <b>2(1)</b>     | 1    | 3.3       | 3         | 59   |
| <i>Pampus chinensis</i>       | 26109    | 2        | 48   | 3        | 57     | 1.3             | <b>2(1)</b>     | 1    | 3.6       | 2         | 59   |
| <i>Parastromateus niger</i>   | 412920   | 3        | 49   | 3        | 64     | 0.9             | <b>3(1)</b>     | 1    | 2.9       | 3         | 59   |
| <i>Pennahia argentata</i>     | 44621    | 2        | 50   | 3        | 65     | 1               | 2               | 66   | 4.1       | 1         | 59   |
| <i>Polynemus paradiseus</i>   | 4985     | 1        | 51   | 3        | 57     | 1.91            | <b>2(1)</b>     | 1    | 3.9       | 2         | 59   |
| <i>Pomadasys argenteus</i>    | 10550    | 1        | 52   | 3        | 20     | 2.12            | <b>1(1)</b>     | 1    | 3.5       | 2         | 59   |
| <i>Rastrelliger kanagurta</i> | 42517    | 2        | 53   | 3        | 20     | 1.72            | <b>2(1)</b>     | 1    | 3.2       | 3         | 59   |
| <i>Rhinomugil corsula</i>     | 9506     | 1        | 54   | 3        | 57     | 0.34            | <b>3(1)</b>     | 1    | 2.4       | 3         | 59   |
| <i>Scoliodon laticaudus</i>   | 10       | 1        | 55   | 1        | 57     | 2.07            | <b>1(1)</b>     | 1    | 3.8       | 2         | 59   |
| <i>Scomberomorus guttatus</i> | 385000   | 3        | 56   | 3        | 20     | 1.8             | 2               | 67   | 4.3       | 1         | 59   |

**Table S3.** (cont...) Productivity attributes with values (e.g.,  $t_{max}$  value), scores (e.g.,  $t_{ma}$  score) and corresponding references used in the productivity susceptibility analysis (PSA) for the selected bycatch of Hilsa gillnet fishery of Bangladesh. Each of the attribute's names in full form is provided in the main text (Table 2). Attributes values have mainly complied from existing literature (normal text). In absence of information for particular attributes (bold italic text), we have assigned scores in both the conservative and alternative scoring methods. Score inside the parentheses is being assigned considering conservative scoring approach, whereas value outside the parentheses is assigned based on corresponding attribute value calculated from empirical relationship equations (described in the main text).

| Species name                 | $L_{mat}$<br>value | $L_{mat}$<br>score | Ref<br>. | BC<br>score | Ref.      | $t_{mat}/t_{max}$<br>value | $t_{mat}/t_{max}$<br>score | Ref.     | $L_{mat}/L_{max}$<br>value | $L_{mat}/L_{max}$<br>score | Ref.      |
|------------------------------|--------------------|--------------------|----------|-------------|-----------|----------------------------|----------------------------|----------|----------------------------|----------------------------|-----------|
| <i>Clupisoma garua</i>       | 34.1               | <b>2(1)</b>        | 1        | 2           | 37        | 0.26                       | 2                          | 1,<br>63 | 0.57                       | 2                          | 1, 12     |
| <i>Coilia ramcarati</i>      | 15.7               | <b>3(1)</b>        | 1        | 3           | 38        | 0.3                        | <b>1(1)</b>                | 1        | 0.63                       | 1                          | 1, 13     |
| <i>Harpadon nehereus</i>     | 24.5               | 2                  | 68       | 3           | 18        | 0.29                       | <b>2 (1)</b>               | 1        | 0.61                       | 1                          | 45,<br>68 |
| <i>Ilisha filigera</i>       | 27.5               | <b>2(1)</b>        | 1        | 3           | 40        | 0.25                       | 2                          | 2,<br>42 | 0.59                       | 2                          | 1, 15     |
| <i>Lates calcarifer</i>      | 77.5               | <b>1(1)</b>        | 1        | 3           | 20        | 0.33                       | 1                          | 3,<br>20 | 0.51                       | 3                          | 1, 16     |
| <i>Lepturacanthus savala</i> | 38                 | 2                  | 4        | 2           | 72        | 0.17                       | 3                          | 1, 4     | 0.37                       | 3                          | 15,<br>17 |
| <i>Megalaspis cordyla</i>    | 22                 | 2                  | 20       | 2           | 20        | 0.33                       | 1                          | 1, 5     | 0.55                       | 2                          | 18,<br>20 |
| <i>Mystus gulio</i>          | 18.04              | <b>3(1)</b>        | 1        | 3           | 44        | 0.3                        | 2                          | 1, 3     | 0.62                       | 1                          | 1, 19     |
| <i>Nemipterus japonicus</i>  | 18.3               | 3                  | 45       | 3           | 45        | 0.11                       | 3                          | 1, 6     | 0.57                       | 2                          | 20,<br>45 |
| <i>Netuma thalassinus</i>    | 52                 | 1                  | 46       | 3           | 20,<br>46 | 0.25                       | <b>2(1)</b>                | 1        | 0.55                       | 2                          | 21,<br>46 |
| <i>Otolithoides pama</i>     | 19.02              | <b>2(1)</b>        | 1        | 2           | 3         | 0.31                       | 1                          | 1, 3     | 0.61                       | 1                          | 1, 3      |
| <i>Pampus argenteus</i>      | 27.5               | 2                  | 69       | 3           | 69        | 0.26                       | 2                          | 1, 7     | 0.53                       | 2                          | 22,<br>69 |
| <i>Pampus chinensis</i>      | 29                 | <b>2(1)</b>        | 1        | 2           | 73        | 0.27                       | <b>2(1)</b>                | 1        | 0.58                       | 2                          | 1, 22     |

|                                   |       |             |    |   |    |      |             |          |      |   |           |
|-----------------------------------|-------|-------------|----|---|----|------|-------------|----------|------|---|-----------|
| <i>Parastromateus niger</i>       | 31    | 2           | 18 | 2 | 49 | 0.15 | 3           | 1, 8     | 0.57 | 2 | 18,<br>22 |
| <i>Pennahia argentata</i>         | 26    | <b>2(1)</b> | 1  | 3 | 65 | 0.29 | 2           | 1,<br>66 | 0.59 | 2 | 1, 23     |
| <i>Polynemus paradiseus</i>       | 13.9  | <b>3(1)</b> | 1  | 2 | 51 | 0.31 | <b>1(1)</b> | 1        | 0.64 | 1 | 1, 24     |
| <i>Pomadasys argenteus</i>        | 31.6  | <b>2(1)</b> | 1  | 3 | 74 | 0.27 | <b>2(1)</b> | 1        | 0.57 | 2 | 1, 20     |
| <i>Rastrelliger kanagurta</i>     | 21.5  | 2           | 53 | 3 | 53 | 0.43 | 1           | 1, 9     | 0.83 | 1 | 25,<br>53 |
| <i>Rhinomugil corsula</i>         | 10.42 | 3           | 34 | 2 | 54 | 0.05 | 3           | 1,<br>10 | 0.3  | 3 | 14,<br>34 |
| <i>Scoliodon laticaudus</i>       | 35.79 | 2           | 70 | 2 | 55 | 0.35 | 1           | 1,<br>11 | 0.48 | 3 | 26,<br>70 |
| <i>Scomberomorus<br/>guttatus</i> | 40    | 1           | 71 | 3 | 36 | 0.36 | 1           | 1,<br>67 | 0.49 | 3 | 18,<br>71 |

## References

1. Froese, R., Binohlan, C., 2000. Empirical relationships to estimate asymptotic length, length at first maturity and length at maximum yield per recruit in fishes, with a simple method to evaluate length frequency data. *Journal of Fish Biology*, 56, 758–773.
2. Blabber, S.J.M., Staunton-Smith, J., Milton, D.A., Fry, G., Van der Velde, T., Pang, J., Wong, P., Ong Boon-Tech., 1998. The Biology and Life-history strategies of *Ilisha* (Teleostei: Pristigasteridae) in the coastal waters and Estuaries of Sarawak. *Estuarine. Coastal and Shelf Science*, 47, 9– 511.
3. Mustafa, M.G., Ahmed, I., Ilyas, M., 2019. Population dynamics of five important commercial fish species in the Sundarbans ecosystem of Bangladesh. *Journal of Applied Life Sciences International*, 22, 1–13.
4. Pakhmode, P.K., Mohite, S.A., Naik, S.D., Mohite, A.S., 2013. Length–frequency analysis and length–weight relationship of ribbon fish *Lepturacanthus savala* (Cuvier1829) off Ratnagiri coast Maharashtra. *International Journal of Fisheries and Aquatic Studies*, 1, 25–30.
5. Qamar, N., Panhwar, S.K., Brouwer, S., 2016. Population characteristics and biological reference point estimates for two Carangid Fishes, *Megalaspis cordyla* and *Scomberoides tol*, in the Northern Arabian Sea Coast of Pakistan. *Pakistan Journal of Zoology*, 48, 869–874.
6. Kalhor, M.A., Liu, Q., Memon, K.H., Chang, M.S., Zhang, K., 2014. Population dynamics of Japanese threadfin bream *Nemipterus japonicus* from Pakistani waters. *Acta Oceanologica Sinica*, 33, 49–57.
7. Lee, D.W., Kim, Y.M., Hong, B.Q., 1992. Age and growth of silver pomfret (*Pampus argenteus*) in Korean waters. *Bulletin: National Fisheries Research and Development Agency of Korea*, 46, 31–40.
8. Yadollahvand, R., Rahnama, B., 2014. The age determination of black pomfret (*Parastromateus niger*), based on otolith cross sections in Iranian coast of Oman Sea. *Journal of Aquaculture Research and Development*, 5, 1–4.
9. Mehanna, S., 2001. Dynamics and management of the Indian mackerel *Rastrelliger kanagurta* (Cuvier, 1816) in the Gulf of Suez, Egypt. *Egyptian Journal of Aquatic Biology and Fisheries*, 5, 179–194.
10. Kumar, R.S., Sarkar, U.K., Gusain, O., Dubey, V.K., Pandey, A., Lakra, W.S., 2014. Age, growth, population structure and reproductive potential of a vulnerable freshwater Mullet, *Rhinomugil corsula* (Hamilton, 1822) from a Tropical River Betwa in central India. *Proceedings of the National Academy of Sciences, India Section B: Biological Sciences*, 84, 275–286.
11. Compagno, L.J.V., 1984. *FAO Species Catalogue. Vol. 4. Sharks of the world. An annotated and illustrated catalogue of shark species known to date. Part 2–Carcharhiniformes*. *FAO Fish. Synop.* 125(4/2):251–655. Rome: FAO.
12. Shafi, M., Quddus, M.M.A., 1982. *Fisheries Resources of Bangladesh (in bengali): Bangla Academy, Dhaka, Bangladesh*.
13. Huda, M.S., Haque, M.E., Babul, A.S., Shil, N.C., 2003. *Field guide to finfishes of Sundarban*. Aquatic Resources Division, Sundarban. Sundarban Biodiversity Conservation Project, Bangladesh Forest Department, Boyra, Khulna, Bangladesh. pp. 61
14. Rahman, A.K.A., 2005. *Freshwater fishes of Bangladesh, second edition*. Zoological Society of Bangladesh, Department of Zoology, University of Dhaka, Dhaka–1000.
15. Rashid, H., Mustafa, M.G., Sukhan, Z.P., Dewan, S., Matsuyama, M., 2007. Growth, mortality, recruitment patterns and the length–weight relationships of big eye shad (*Ilisha filigera*) captured by set bag nets in the upper Bay of Bengal off the Bangladesh coast. *Bulletin of the Institute of Tropical Agriculture, Kyushu University*, 30, 39–45.
16. Munro, I.S.R., 2000. *The Marine and Freshwater Fishes of Ceylon*. Narendra Publishing House, Delhi, India.
17. Mustafa, M.G., Zafar, M., Haque, M.A., Amin, S.N., 2000. Population dynamics of the ribbon fish, *Lepturacanthus savala* (Cuvier 1829) from the north-eastern part of the Bay of Bengal. *Bangladesh Journal of Fisheries Research*, 4, 179–184.
18. Quddus, M.M.A., Shafi, M., 1983. *The fisheries resources of the Bay of Bengal (in bengali)*. Kabir Publications, 38/3, Bangla Bazar, Dhaka, Bangladesh.
19. Begum, M., Pal, H.K., Islam, M.A., Alam, M.J., 2009. Length–weight relationship and growth condition of *Mystus gulio* (Ham.) in different months and sexes. *University Journal of Zoology (Rajshahi University)*, 28, 73–75.
20. Rahman, A.K.A., Kabir, S.M.H., Ahmad, M., Ahmed, A.T.A., Ahmed, Z.U., Begum, Z.N.T., Hassan, M.A. and Khondker, M. (eds.), 2009. *Encyclopedia of Flora and Fauna of Bangladesh, Vol 24. Marine Fishes*. Asiatic Society of Bangladesh, Dhaka. pp. 485
21. Sultana, R., Alam, M.S., Nazrul, K.M.S., Mamun, A., Al-Mamun, M.A., 2019. Length–weight relationship and population dynamics study of the giant catfish (*Arius thalassinus*) in the Bay of Bengal coast of Bangladesh. *Research in Agriculture Livestock and Fisheries*, 6, 439–444.
22. Karim, E., Liu, Q., Rahman, M.F., Khatun, M.H., Barman, P.P., Shamsuzzaman, M.M., Mahmud, Y., 2018. Comparative assessment of population biology of three popular pomfret species, *Pampus argenteus*, *Pampus chinensis* and *Parastromateus niger* in the Bay of Bengal, Bangladesh. *Iranian Journal of Fisheries Sciences*, 1–22. <https://doi.org/10.22092/ijfs.2018.119873>
23. Zafar, M., Mustafa, G., Amin, S.M.N., Haque, M.A., 2000b. Population dynamics of *Johnius argentatus* (Houttuyn) from the Northeastern Part of the Bay of Bengal, Bangladesh. *Asian Fisheries Science*, 13, 243–249.
24. Hossen, M.A., Hossain, M.Y., Ali, M.M., Pramanik, M.N., Nawer, F., Islam, M.A., Hossain, M.A., Bahkali, A.H. and Elgorban, A.M., 2017. Seasonal variations of growth pattern and condition of Paradise threadfin *Polynemus paradiseus* (Polynemidae) from Tetulia River in Southern Bangladesh. *Indian Journal of Geo Marine Sciences*, 46, 582–590.

25. Mustafa, M.G., Shahadat, A.H., 2003. Population dynamics and the management of the Indian mackerel *Rastrelliger kanagurta* from the Bay of Bengal. *Bangladesh Journal of Fisheries Research*, 7, 159–168.
26. Hussain, M.M., 1971. The commercial fishes of the Bay of Bengal, Survey for the Development of Fisheries in East Pakistan, UNDP Project PAK 22, Project Publication No. 1. pp. 6
27. Ahmed, M.S., Khanom, R., Mostafa, M.G., 2003. Population dynamics of *Clupisoma garua* (Siluriformes: Schilbeidae) from the river Jamuna. *Bangladesh Journal of Fisheries Research*, 31, 7–14.
28. Parvez, M.S., Nabi, M.R., 2015a. Population dynamics of *Coilia ramcarati* from the estuarine set bagnet fishery of Bangladesh. *Walailak Journal of Science and Technology*, 12, 539–552.
29. Sarker, M.N., Humayun, M., Rahman, M.A., Uddin, M.S., 2017. Population dynamics of Bombay Duck *Harpodon nehereus* (Hamilton, 1822) of the Bay of Bengal along Bangladesh coast. *Bangladesh Journal of Zoology*, 45, 101–110.
30. Zafar, M., Mustafa, G., Amin, S.M.N., Haque, M.A., 2000a. Population dynamics of *Megalaspis cordyla* (Linnaeus, 1758) from northeastern part of the Bay of Bengal, Bangladesh. *Asian Fisheries Science*, 47, 163–168.
31. Mustafa, M.G., 1994. Length-based estimates of vital statistics in threadfin bream (*Nemipterus japonicus*) from Bay of Bengal, Bangladesh. *Naga, the ICLARM Quarterly*, 17, 34–37.
32. Rashed-Un-Nabi, M., Hoque, M.A., Rahman, R.A., Mustafa, S., Kader, M.A., 2007. Population dynamics of *Polynemus paradiseus* from estuarine Set Bag Net fishery of Bangladesh. *Chiang Mai Journal of Science*, 34, 355–365.
33. Mustafa, G.M., Azadi, M.A., 1995. Population dynamics of White Grunter *Pomadasys hasta* from the Bay of Bengal. *Chittagong University Studies Part II Science*, 19, 19–22.
34. Ara, S.I., Azadi, M.A., Nasiruddin, M., Hossain, A., Mustafa, M.G., 2019. Population dynamics of the mullet fish, *Rhinomugil corsula* (Hamilton, 1822), in the Sitakunda coast of the Bay of Bengal. *Bangladesh Journal of Zoology*, 47, 305–314.
35. Karim, E., Qun, L., Mahmood, M.A., Baset, A., Hoq, M.E., Shamsuzzaman, M.M., Das, A., 2017. Assessment of some demographic trends of Spadenose shark (*Scoliodon laticaudus*) of the Bay of Bengal, Bangladesh. *Indian Journal of Geo-Marine Sciences*, 46, 1986–1995.
36. Rashid, H., Mustafa, M.G., Dewan, S., 2010. Population dynamics and the management of *Scomberomorus guttatus* the Indo-Pacific king mackerel from the upper Bay of Bengal off Bangladesh coast. *Bangladesh Veterinarian*, 27, 82–90.
37. Hasan, M., Hosen, M., All, H., Miah, M., Ahmed, Z.F., Chhanda, M.S., Shahriar, S.I.M., 2019. Fecundity, length at maturity and gonadal development indices of river catfish (*Clupisoma garua*) of the old Brahmaputra River in Bangladesh. *Egyptian Journal of Aquatic Research (Online)*. 10.1016/j.ejar.2019.05.008
38. Parvez, M.S., Rashed-Un-Nabi, M., 2015b. Reproductive biology of Tapper Tail Anchovy *Coilia ramcarati* along the coast of Chittagong. *Suranaree Journal of Science and Technology*, 22, 397–408.
39. Fernandez, I., Devaraj, M., 1996b. Dynamics of the Bombay duck (*Harpodon nehereus*) stock along the northwest coast of India. *Indian Journal of Fisheries*, 43(1):1–11.
40. Mahmood, K., Ayub, Z., Siddiqui, G., 2011. Sex-ratio, maturation and spawning of the Indian ilisha, *Ilisha melastoma* (clupeiformes: pristigasteridae) in coastal waters of Pakistan (northern Arabian Sea). *Indian Journal of Geo-Marine Sciences*, 40, 516–52.
41. Patnaik, S., Jena, S., 1976. Some aspects of biology of *Lates calcarifer* (Bloch) from Chilka Lake. *Indian Journal of Fisheries*, 23, 65–71.
42. Bal, D.V., Rao, K.V., 1984. *Marine fisheries of India*, (Tata Mc-Graw-Hill Publishing Company Limited, New Delhi, pp. 1–212
43. Sivakami, S., 1995. Fishery and biology of the carangid fish *Megalaspis cordyla* (Linnaeus) off Cochin. *Journal of the Marine Biological Association of India*, 37, 237–248.
44. Sarker, P.K., Pal, H.K., Rahman, M.M., Rahman, M.M., 2002. Observation on the fecundity and gonado-somatic index of *Mystus gulio* in brackishwater of Bangladesh. *Online Journal of Biological Sciences*, 2, 235–237.
45. Manojkumar, P.P., 2004. Some aspects on the biology of *Nemipterus japonicus* (Bloch) from Veraval in Gujarat. *Indian Journal of Fisheries*, 51, 185–191.
46. Kamukuru, A.T., Tamatamah, R.A., 2014. The distribution, biological characteristics and vulnerability of the Giant Sea Catfish, *Arius thalassinus* (Rüppell, 1837), to fishing at Mafia Island, Tanzania. *Western Indian Ocean Journal of Marine Science*, 13, 163–175.
47. Shamsul Hoda, S.M., Ajazuddin, S., 1992. Some aspects of reproductive biology of two sciaenids, *Otolithes cuvieri* Trewavas and *Johnius elongatus* Mohan: maturation, spawning, sex ratio and fecundity. *Pakistan Journal of Marine Sciences*, 1, 95–110.
48. Akhter, F., Islam, M.M., Mamun, M.M.U., Zahangir, M.M., 2019a. Gonadal maturation cycle of Silver pomfret (*Pampus argenteus*) from the Bay of Bengal, Bangladesh. 8th BFRF Biennial Fisheries Conference and Research Fair, Dhaka, Bangladesh.
49. Hoque, M.N., Das, N.G., Sharif, A.S.M., Das, J., Kamal, A.H.M., 2018. Maturation patterns of black pomfret (*Parastromateus niger*) from coastal waters of the Bay of Bengal, Bangladesh. *Journal of Noakhali Science and Technology University (JNSTU)*, 2, 1–9.
50. Devadoss, P., 1969. Maturity and spawning in *Otolithus ruber* (Schn.) and *Johnlos dussumieri* (C.&V.). *Indian Journal of Fisheries*, 16, 117–128.



51. Rahman, M., Sultana, A., Hasan, M.M., Sarker, B.S., Rahman, M., 2013. Estimation of fecundity and gonadosomatic index (GSI) of Paradise Threadfin, *Polynemus Paradiseus* (Linnaeus, 1758) from the Meghna river estuary, Bangladesh. Daffodil International University Journal of Science and Technology, 8, 6–10.
52. Adebisi, F.A., 2013. The sex ratio, gonadosomatic index, stages of gonadal development and fecundity of Sompot grunt, *Pomadasys jubelini* (Cuvier, 1830). Pakistan Journal of Zoology, 45, 41–46.
53. Akhter, F., 2019b. Determination of breeding season of Indian mackerel (*Rastrelliger kanagurta*) from the Bay of Bengal, Bangladesh. Doctoral dissertation, Department of Fish Biology Chattogram Veterinary and Animal Sciences University, Chattogram-4225, Bangladesh.
54. Akter, H., Islam, M.R., Hossain, M.B., 2012. Fecundity and gonadosomatic index (GSI) of Corsula, *Rhinomugil corsula* Hamilton, 1822 (Family: Mugilidae) from the lower Meghna River estuary, Bangladesh. Global Veterinaria, 9, 129–132.
55. Sen, S., Chakraborty, S.K., Zacharia, P.U., Dash, G., Joe Kizhakudan, S., Bharadiya, S.A., Gohel, J.K., 2018. Reproductive strategy of spadenose shark, *Scoliodon laticaudus* Muller and Henle, 1839 along north-eastern Arabian Sea. Journal of Applied Ichthyology, 34, 1304–1313.
56. Siddeek, M.S.M., 1995. Review of fisheries biology of *Scomberomorus* and *Acanthocybium* species in the Western Indian Ocean (FAO Area 51). Working Group on Pelagics, Gulfs Committee for Fisheries Management and Development. Working Paper WGP 95/2. pp.32
57. Breder, C.M., Rosen, D.E., 1966. Modes of reproduction in fishes. T.F.H. Publications, Neptune City, New Jersey.
58. Thresher, R.E., 1984. Reproduction in reef fishes. T.F.H. Publications, Inc. Ltd., Neptune City, New Jersey. pp. 399
59. Froese, R., Pauly, D., 2019. FishBase. World Wide Web electronic publication. www.fishbase.org, version (12/2019).
60. Nakamura, I., Parin, N.V., 1993. FAO Species Catalogue. Vol. 15. Snake mackerels and cutlassfishes of the world (families Gempylidae and Trichiuridae). An annotated and illustrated catalogue of the snake mackerels, snoeks, escolar, gemfishes, sackfishes, domine, oilfish, cutlassfishes, scabbardfishes, hairtails, and frostfishes known to date. FAO Fish. Synop. 125(15), 136.
61. Gross, M.R., Shine, R., 1981. Parental care and mode of fertilization in ectothermic vertebrates. Evolution, 35, 775–793.
62. Frimodt, C., 1995. Multilingual illustrated guide to the world's commercial warmwater fish. Fishing News Books, Osney Mead, Oxford, England. pp. 215
63. Siddiqui, K.U., Islam, M.A., Kabir, S.M.H., Ahmad, M., Ahmed, A.T.A., Rahman, A.K.A., Haque, E.U., Ahmed, Z.U., Begum, Z.N.T., Hassan, M.A., Khondker, M., Rahman, M.M. (eds.), 2007. Encyclopedia of Flora and Fauna of Bangladesh, Vol. 23. Freshwater Fishes. Asiatic Society of Bangladesh, Dhaka. pp 300.
64. Hernando, A.M. Jr., 1981. Contributions to the taxonomy and biology of *Formio niger* (Bloch) in Lingayen Gulf. College of Arts and Sciences, University of the Philippines, Diliman. pp. 102.
65. Somasekharan Nair, K.V.S., 1977. Maturity and spawning of *Johnius* (Johnieops) *sina* (Cuvier) at Calicut during 1969–72. Indian Journal of Fisheries, 24, 15–24.
66. Lan, Y.L., Luo, B.Z., 1995. Age and growth of six Sciaenid fishes (Sciaenidae) in the East China Sea. Chinese Journal of Oceanology and Limnology, 26, 109–114.
67. Devaraj, M., 1987. Maturity, spawning and fecundity of the spotted seer, *Scomberomorus guttatus*, in the Gulf of Mannar and Palk Bay. Indian Journal of Fisheries, 34, 48–77.
68. Nugroho, D., Faizah, R., Prasetyo, A.P., Badrudin, M., 2015. Bio-exploitation status of Bombay Duck (*Harpodon nehereus* Hamilton, 1822) on trawl fishery in Tarakan waters. Indonesian Fisheries Research Journal, 21, 53–59.
69. Ghosh, S., Mohanraj, G., Asokan, P.K., Dhokia, H.K., Zala, M.S., and Bhint, H.M., 2009a. Fishery and stock estimates of the silver pomfret, *Pampus argenteus* (Euphrasen), landed by gill netters at Veraval. Indian Journal of Fisheries, 56, 177–182.
70. Sen, S., Chakraborty, S.K., Vivekanandan, E., Zacharia, P.U., Kizhakudan, S.J., Jaiswar, A.K., Dash, G., Jayshree, G., Bharadiya, S.A., 2019. Population dynamics and stock assessment of spadenose shark *Scoliodon laticaudus* Muller and Henle 1839 along Gujarat coast of India. Indian Journal of Geo Marine Sciences, 48, 423–433.
71. Parvez, M.S., Nabi, M.R., 2015a. Population dynamics of *Coilia ramcarati* from the estuarine set bagnet fishery of Bangladesh. Walailak Journal of Science and Technology, 12, 539–552.
72. Rizvi, A.F., Nautiyal, P., 2002. Landing and exploitation pattern of ribbon fish from Mumbai Coast. Himalayan Journal of Environment and Zoology, 16, 95–102.
73. Bunlipatanon, P., Detsathit, S., Soonsun, P., 2002. Reproductive biology and preliminary study on breeding of Grey Pomfret, *Pampus chillensis* (Euphrasen). Krabi Coastal Aquaculture Station, Thailand, Technical Paper No. 17/2002
74. Abu-Hakima, R., 1984b. Comparison of aspects of the reproductive biology of *Pomadasys*, *Otolithes* and *Pampus* spp. in Kuwaiti waters. Fisheries research, 2, 177–200.

**Table S4.** Susceptibility attributes with scores (e.g., AO score) and corresponding references used in the productivity susceptibility analysis (PSA) for the selected bycatch of Hilsa gillnet fishery of Bangladesh. Each of the attribute's names in full form is provided in the main text (Table 3). Attributes values have mainly complied from existing literature, focus group discussion (FGD) and direct field observation (DO) (normal text). In absence of information for particular attributes (bold italic text), we have assigned scores in both the conservative and alternative scoring methods. Score inside the parentheses is being assigned considering conservative scoring approach, whereas value outside the parentheses is assigned based on expert opinion from key informant interview (KII).

| Species name                 | A<br>O | Ref.   | VO          | Ref.            | SM | Ref.    | SAB<br>R | Ref.   | MCA<br>C | Ref.       | MSt | Ref.        | SC<br>R      | Ref.     | MV<br>F | Ref. | MDF | Ref.    | F/<br>M | Ref. |
|------------------------------|--------|--------|-------------|-----------------|----|---------|----------|--------|----------|------------|-----|-------------|--------------|----------|---------|------|-----|---------|---------|------|
| <i>Clupisoma garua</i>       | 1      | 1; FGD | <b>3(3)</b> | <b>FGD, KII</b> | 3  | 3; 4    | 3        | 10     | 3        | 10; 14; 16 | 2   | 21; 22; FGD | <b>3 (3)</b> | FGD, KII | 3       | DO   | 3   | FGD, DO | 2       | 24   |
| <i>Coilia ramcarati</i>      | 3      | 1; FGD | 3           | 2; FGD          | 3  | 3; 4    | 3        | 7      | 1        | 5; 7       | 2   | 21; 22; FGD | 3            | 23; FGD  | 1       | DO   | 1   | FGD, DO | 3       | 25   |
| <i>Harpadon nehereus</i>     | 3      | 2; FGD | 3           | 2; FGD          | 2  | 3; 5    | 3        | 7      | 1        | 5; 7       | 2   | 21; 22; FGD | 3            | 23; FGD  | 1       | DO   | 3   | FGD, DO | 3       | 26   |
| <i>Ilisha filigera</i>       | 3      | 1; FGD | 3           | 2; FGD          | 3  | 3; 4    | 3        | 7      | 3        | 5; 7       | 2   | 21; 22; FGD | 3            | 23; FGD  | 2       | DO   | 2   | FGD, DO | 2       | 27   |
| <i>Lates calcarifer</i>      | 3      | 2; FGD | 3           | 2; FGD          | 2  | 3; 4    | 3        | 11     | 3        | 5; 7       | 2   | 21; 22; FGD | 3            | 23; FGD  | 3       | DO   | 3   | FGD, DO | 2       | 28   |
| <i>Lepturacanthus savala</i> | 3      | 2; FGD | 3           | 2; FGD          | 2  | 6; 7    | 3        | 12; 13 | 1        | 5; 7       | 2   | 21; 22; FGD | 3            | 23; FGD  | 2       | DO   | 3   | FGD, DO | 2       | 29   |
| <i>Megalaspis cordyla</i>    | 2      | 2; FGD | 2           | 2; FGD          | 2  | 7       | 3        | 7      | 3        | 5; 7       | 2   | 21; 22; FGD | 3            | 23; FGD  | 1       | DO   | 2   | FGD, DO | 2       | 30   |
| <i>Mystus gulio</i>          | 3      | 1; FGD | <b>3(3)</b> | FGD, KII        | 2  | 3; 4    | 3        | 14     | 3        | 10; 14; 16 | 2   | 21; 22; FGD | <b>3 (3)</b> | FGD, KII | 2       | DO   | 3   | FGD, DO | 2       | 28   |
| <i>Nemipterus japonicus</i>  | 1      | 2; FGD | 1           | 2; FGD          | 1  | 7; 8    | 3        | 7      | 3        | 5; 7       | 2   | 21; 22; FGD | 3            | 23; FGD  | 2       | DO   | 2   | FGD, DO | 2       | 31   |
| <i>Netuma thalassinus</i>    | 3      | 2; FGD | 3           | 2; FGD          | 3  | 4       | 3        | 12; 15 | 3        | 5; 7       | 2   | 21; 22; FGD | 3            | 23; FGD  | 2       | DO   | 2   | FGD, DO | 3       | 32   |
| <i>Otolithoides pama</i>     | 3      | 1; FGD | <b>3(3)</b> | <b>FGD, KII</b> | 3  | 3; 4    | 3        | 10; 16 | 3        | 10; 14; 16 | 2   | 21; 22; FGD | 3            | FGD, KII | 2       | DO   | 3   | FGD, DO | 1       | 28   |
| <i>Pampus argenteus</i>      | 3      | 2; FGD | 3           | 2; FGD          | 2  | 3; 7    | 3        | 12; 7  | 2        | 5; 7       | 2   | 21; 22; FGD | 3            | 23; FGD  | 3       | DO   | 3   | FGD, DO | 1       | 33   |
| <i>Pampus chinensis</i>      | 3      | 2; FGD | 3           | 2; FGD          | 2  | 3; 7    | 2        | 12; 7  | 2        | 5; 7       | 2   | 21; 22; FGD | 3            | 23; FGD  | 3       | DO   | 3   | FGD, DO | 2       | 33   |
| <i>Parastrumateus niger</i>  | 3      | 2; FGD | 3           | 2; FGD          | 2  | 3; 4; 9 | 3        | 12; 7  | 3        | 5; 7       | 2   | 21; 22; FGD | 3            | 23; FGD  | 3       | DO   | 3   | FGD, DO | 3       | 33   |
| <i>Pennahia argentata</i>    | 3      | 2; FGD | 3           | 2; FGD          | 1  | 4       | 3        | 7      | 3        | 5; 7       | 2   | 21; 22; FGD | 3            | 23; FGD  | 2       | DO   | 2   | FGD, DO | 1       | 34   |

|                               |   |        |      |                     |   |      |   |       |   |               |   |                |       |                     |   |    |   |         |   |    |
|-------------------------------|---|--------|------|---------------------|---|------|---|-------|---|---------------|---|----------------|-------|---------------------|---|----|---|---------|---|----|
| <i>Polynemus paradiseus</i>   | 3 | 1; FGD | 3    | 2; FGD              | 3 | 3    | 3 | 17    | 2 | 5; 7          | 2 | 21; 22;<br>FGD | 3     | 23; FGD             | 3 | DO | 3 | FGD, DO | 3 | 35 |
| <i>Pomadasys argenteus</i>    | 3 | 2; FGD | 3    | 2; FGD              | 2 | 9; 7 | 2 | 7     | 3 | 5; 7          | 2 | 21; 22;<br>FGD | 3     | 23; FGD             | 2 | DO | 3 | FGD, DO | 3 | 36 |
| <i>Rastrelliger kanagurta</i> | 2 | 2; FGD | 2    | 2; FGD              | 1 | 7; 4 | 3 | 7; 18 | 3 | 5; 7          | 2 | 21; 22;<br>FGD | 3     | 23; FGD             | 2 | DO | 3 | FGD, DO | 3 | 37 |
| <i>Rhinomugil corsula</i>     | 3 | 1; FGD | 3(3) | <b>FGD,<br/>KII</b> | 2 | 3; 4 | 3 | 19    | 2 | 10; 14;<br>16 | 2 | 21; 22;<br>FGD | 3 (3) | <b>FGD,<br/>KII</b> | 2 | DO | 3 | FGD, DO | 2 | 38 |
| <i>Scoliodon laticaudus</i>   | 3 | 2; FGD | 3    | 2; FGD              | 2 | 4    | 3 | 20    | 3 | 5; 7          | 2 | 21; 22;<br>FGD | 3     | 23; FGD             | 1 | DO | 1 | FGD, DO | 3 | 39 |
| <i>Scomberomorus guttatus</i> | 2 | 2; FGD | 2    | 2; FGD              | 1 | 7; 4 | 3 | 5; 7  | 3 | 5; 7          | 2 | 21; 22;<br>FGD | 3     | 23; FGD             | 2 | DO | 3 | FGD, DO | 2 | 40 |

## References

1. IUCN, 2015. Red List of Bangladesh Volume 5: Freshwater Fishes. IUCN, International Union for Conservation of Nature, Bangladesh Country Office, Dhaka, Bangladesh, pp. 1–360.
2. Roy, B.J., Singha, N.K., Rahman, M.G., Mohanta, S.K., Nazrul, K.M.S., Al-Mamun, 2019. Production trends of different group of industrial marine fishes in Bangladesh. *Int. J. Adv. Res. Biol. Sci.* 6, 28–43.
3. Hossain, M.A.R., Wahab, M.A., Belton, B., 2012. The checklist of the riverine fishes of Bangladesh. *Fan-Bangladesh*, 2, 29–39.
4. Riede, K., 2004. Global register of migratory species – from global to regional scales. Final Report of the R&D-Projekt 808 05 081. Federal Agency for Nature Conservation, Bonn, Germany. pp. 329.
5. Quddus, M.M.A., Shafi, M., 1983. The Fisheries Resources of the Bay of Bengal (in bengali). Kabir Publications, 38/3, Bangla Bazar, Dhaka, Bangladesh.
6. Nakamura, I., Parin, N.V., 1993. FAO Species Catalogue. Vol. 15. Snake mackerels and cutlassfishes of the world (families Gempylidae and Trichiuridae). An annotated and illustrated catalogue of the snake mackerels, snoeks, escolars, gemfishes, sackfishes, domine, oilfish, cutlassfishes, scabbardfishes, hairtails, and frostfishes known to date. *FAO Fish. Synop.* 125(15), 136.
7. Rahman, A.K.A., Kabir, S.M.H., Ahmad, M., Ahmed, A.T.A., Ahmed, Z.U., Begum, Z.N.T., Hassan, M.A. and Khondker, M. (eds.), 2009. Encyclopedia of Flora and Fauna of Bangladesh, Vol 24. Marine Fishes. Asiatic Society of Bangladesh, Dhaka. pp. 485
8. Russell, B.C., 2001. Nemipteridae. Threadfin breams (also whiptail breams, monocle breams, dwarf monocle breams and coral breams). pp. 3051–3089. In: Carpenter, K.E., Niem, V., (eds.)– FAO Identification Guide for Fishery Purposes. The Western Central Pacific, 5, Part 3 (Menidae to Pomacentridae).
9. Pauly, D., Cabanban, A., Torres Jr., F.S.B., 1996. Fishery biology of 40 trawl-caught teleosts of western Indonesia (pp. 135–216). In: Pauly, D., Martosubroto, P., (eds.) Baseline studies of biodiversity: the fish resource of western Indonesia. *ICLARM Studies and Reviews* 23.
10. Shafi, M., Quddus, M.M.A., 1982. Fisheries Resources of Bangladesh (in bengali).: Bangla Academy, Dhaka, Bangladesh.
11. Mukai, Y., Chai, L.L., Shaleh, S.R.M., Senoo, S., 2007. Structure and development of free neuromasts in barramundi, *Lates calcarifer* (Block). *Zoological science*, 24, 829–835.
12. Froese, R., Pauly, D., 2019. FishBase. World Wide Web electronic publication. [www.fishbase.org](http://www.fishbase.org), version (12/2019).
13. James, P.S.B.R., 1967. The ribbon-fishes of the family Trichiuridae of India. *Marine Biological Association of India Mandapam Camp*, 1, 1–226.
14. Siddiqui, K.U., Islam, M.A., Kabir, S.M.H., Ahmad, M., Ahmed, A.T.A., Rahman, A.K.A., Haque, E.U., Ahmed, Z.U., Begum, Z.N.T., Hassan, M.A., Khondker, M., Rahman, M.M. (eds.), 2007. Encyclopedia of Flora and Fauna of Bangladesh, Vol. 23. Freshwater Fishes. Asiatic Society of Bangladesh, Dhaka. pp 300.
15. Breder, C.M., Rosen, D.E., 1966. Modes of reproduction in fishes. T.F.H. Publications, Neptune City, New Jersey.
16. Rahman, A.K.A., 2005. Freshwater fishes of Bangladesh, second edition. Zoological Society of Bangladesh, Department of Zoology, University of Dhaka, Dhaka–1000.
17. Kagwade, P.V., 1970. Polynemid fishes of India. *CMFRI Bulletin*, 18, 1–79.
18. Noble, A., 1962. Food and feeding habits of the Indian mackerel, *Rastrelliger kanagurta* (Cuvier) at Karwar. *Indian Journal of Fisheries*, 9, 701–713
19. Harrison, I.J., Senou, H., 1997. Order Mugiliformes. Mugilidae. Mulletts. p. 2069–2108. In K.E. Carpenter and V.H. Niem (eds.) FAO species identification guide for fishery purposes. The living marine resources of the Western Central Pacific. Volume 4. Bony fishes part 2 (Mugilidae to Carangidae). FAO, Rome.
20. Compagno, L.J.V., 1984. FAO Species Catalogue. Vol. 4. Sharks of the world. An annotated and illustrated catalogue of shark species known to date. Part 2 – Carcharhiniformes. *FAO Fish. Synop.* 125(4/2):251–655. Rome: FAO.
21. Islam, M.M., Shamsuzzaman, M.M., Mozumder, M.M.H., Xiangmin, X., Ming, Y., Jewel, M.A.S., 2017. Exploitation and conservation of coastal and marine fisheries in Bangladesh: Do the fishery laws matter? *Marine Policy*, 76, 143–151.
22. Murshed-e-Jahan, K., Belton, B., Viswanathan, K. K., 2014. Communication strategies for managing coastal fisheries conflicts in Bangladesh. *Ocean and Coastal Management*, 92, 65–73.
23. IOTC, 2017. Bangladesh national report to the scientific committee of the Indian Ocean Tuna Commission, National Reports, 2017, Scientific Committee (SC). <https://www.iotc.org/documents/bangladesh-nationalreport>.
24. Ahmed, M.S.; Khanom, R.; Mostafa, M.G. Population dynamics of *Clupisoma garua* (Siluriformes: Schilbeidae) from the river Jamuna. *Bangladesh J. Fish. Res.* 2003, 31, 7–14.
25. Parvez, M.S., Nabi, M.R., 2015. Population dynamics of *Coilia ramcarati* from the estuarine set bagnet fishery of Bangladesh. *Walailak J. Sci. Technol.* 12, 539–552.

26. Sarker, M.N., Humayun, M., Rahman, M.A., Uddin, M.S., 2017. Population dynamics of Bombay Duck *Harpodon nehereus* (Hamilton, 1822) of the Bay of Bengal along Bangladesh coast. Bangladesh J. Zool. 45, 101–110.
27. Rashid, H., Mustafa, M.G., Sukhan, Z.P., Dewan, S., Matsuyama, M., 2007. Growth, mortality, recruitment patterns and the length–weight relationships of big eye shad (*Ilisha filigera*) captured by set bag nets in the upper bay of bengal off the Bangladesh coast. Bull. Inst. Trop. Agr., Kyushu Univ. 30, 39–46.
28. Mustafa, M.G., Ahmed, I., Ilyas, M., 2019. Population dynamics of five important commercial fish species in the Sundarbans ecosystem of Bangladesh. J. Appl. Life Sci. Int. 22, 1–13.
29. Mustafa, G., Zafar, M., Haque, M.A., Amin, S.M.N., 2000. Population dynamics of the Ribbon fish, *Lepturacanthus savala* (Cuvier 1829) from the north–eastern part of the Bay of Bengal. Bangladesh J. Fish. Res. 4, 179–184.
30. Zafar, M., Mustafa, G., Amin, S.M.N., Haque, M.A., 2000a. Population dynamics of *Megalaspis cordyla* (Linnaeus, 1758) from northeastern part of the Bay of Bengal, Bangladesh. Asian Fish. Sci. 47, 163–168.
31. Mustafa, M.G., 1994. Length–based estimates of vital statistics in threadfin bream (*Nemipterus japonicus*) from Bay of Bengal, Bangladesh. Naga, ICLARM Q. 17, 34–37.
32. Sultana, R., Alam, M.S., Nazrul, K.M.S., Mamun, A., Al-Mamun, M.A., 2019. Length–weight relationship and population dynamics study of the giant catfish (*Arius thalassinus*) in the Bay of Bengal coast of Bangladesh. Res. Agric. Livest. Fish. 6, 439–444.
33. Karim, E., Liu, Q., Rahman, M.F., Khatun, M.H., Barman, P.P., Shamsuzzaman, M.M., Mahmud, Y., 2018. Comparative assessment of population biology of three popular pomfret species, *Pampus argenteus*, *Pampus chinensis* and *Parastromateus niger* in the Bay of Bengal, Bangladesh. Iran. J. Fish. Sci. 1–22. <https://doi.org/10.22092/ijfs.2018.119873>
34. Zafar, M., Mustafa, G., Amin, S.M.N., Haque, M.A., 2000b. Population dynamics of *Johnius argentatus* (Houttuyn ) from the Northeastern Part of the Bay of Bengal , Bangladesh. 13, 243–249.
35. Rashed–Un–Nabi, M., Hoque, M.A., Rahman, R.A., Mustafa, S., Kader, M.A., 2007. Population dynamics of *Polynemus paradiseus* from estuarine Set Bag Net fishery of Bangladesh. Chiang Mai J. Sci. 34, 355–365.
36. Mustafa, G.M., Azadi, M.A., 1995. Population dynamics of White Grunter *Pomadasys hasta* from the Bay of Bengal. Chittagong Univ. Stud. Part II Sci. 19, 19–22.
37. Mustafa, M.G., Shahadat, A.H., 2003. Population dynamics and the management of the Indian mackerel *Rastrelliger kanagurta* from the Bay of Bengal. Bangladesh J. Fish. Res. 7, 159–168.
38. Ara, S.I., Azadi, M.A., Nasiruddin, M., Hossain, A., Mustafa, M.G., 2019. Population dynamics of the Mullet fish, *Rhinomugil corsula* (Hamilton, 1822), in the Sitakunda coast of the Bay of Bengal. Bangladesh J. Zool. 47, 305–314.
39. Karim, E., Qun, L., Mahmood, M.A., Baset, A., Hoq, M.E., Shamsuzzaman, M.M., Das, A., 2017. Assessment of some demographic trends of Spadenose shark (*Scoliodon laticaudus*) of the Bay of Bengal, Bangladesh. Indian J. Geo–Marine Sci. 46, 1986–1995.
40. Rashid, H., Mustafa, M.G., Dewan, S., 2010. Population dynamics and the management of the Indo–Pacific king mackerel *Scomberomorus guttatus* from the upper Bay of Bengal off Bangladesh coast. Bangladesh Vet. 27, 82–90.
